# Supplementary material for: The Growth Response of Two Diatom Species to Atmospheric Dust from the Last Glacial Maximum
Source: PLoS One. 2016 Jul 6;11(7):e0158553. doi: 10.1371/journal.pone.0158553 (PMC4934930; doi:10.1371/journal.pone.0158553)
Supplement: S1 Data — (XLSX) [file pone.0158553.s001.xlsx]

## Sheet: Iron Data
Species	Treatment	Replicate	Dissolved Fe (nmol per L)
			Day 0$	Day 0£	Day 4	Day 8	Day 12	Day 17
E. antarctica	Control	1	1.8466	1.9517	0.839158	0.85198	0.715137
E. antarctica	Control	2	1.60977	2.25159	0.425334	0.41076	0.594619
E. antarctica	Control	3			0.264271	0.208263	0.224519
E. antarctica	Control	4					0.576822
E. antarctica	Control	5					0.47214
E. antarctica	Control	Mean	1.72818	2.10165	0.509588	0.490334	0.516647
E. antarctica	Control	SD	0.167465	0.212056	0.29656	0.329154	0.184675
E. antarctica	Dust	1	13.613	16.5249	9.13696	12.1265	3.50554
E. antarctica	Dust	2		13.3456		6.61027	1.10878
E. antarctica	Dust	3				8.2555	0.222865
E. antarctica	Dust	4					0.728138
E. antarctica	Dust	5					0.586481
E. antarctica	Dust	Mean	13.613	14.9352	9.13696	8.99743	1.23036
E. antarctica	Dust	SD		2.24816		2.83199	1.31083
E. antarctica	Fe(Cl)3	1	5.97618	5.3926	0.399284	0.516962	0.67986
E. antarctica	Fe(Cl)3	2	5.83598	7.56437	0.532965	0.241763	0.924703
E. antarctica	Fe(Cl)3	3			0.383935	0.169507	1.0972
E. antarctica	Fe(Cl)3	4					0.541176
E. antarctica	Fe(Cl)3	5					0.600549
E. antarctica	Fe(Cl)3	Mean	5.90608	6.47848	0.438728	0.309411	0.768698
E. antarctica	Fe(Cl)3	SD	0.0991379	1.53567	0.0819715	0.18334	0.23462
P. inermis	Control	1	1.94973	4.74437	0.364712	1.18757	1.21928	2.0632
P. inermis	Control	2	1.93447	4.07852	1.52321	3.07923	0.521721	1.61291
P. inermis	Control	3	1.88869		0.833537	1.4336	0.0817209	1.94974
P. inermis	Control	4						1.87097
P. inermis	Control	5						0.901689
P. inermis	Control	Mean	1.9243	4.41144	0.907153	1.90014	0.607574	1.6797
P. inermis	Control	SD	0.0317665	0.470827	0.582747	1.02851	0.573618	0.465389
P. inermis	Dust	1	9.97074	12.4254	7.1306	6.68842	0.714655	2.06371
P. inermis	Dust	2	8.48548	13.8795	9.82334	9.49171	1.02702	0.398466
P. inermis	Dust	3			8.17085	6.69409	0.842249	0.703163
P. inermis	Dust	4						0.613027
P. inermis	Dust	5						0.496814
P. inermis	Dust	Mean	9.22811	13.1524	8.37493	7.62474	0.861308	0.855036
P. inermis	Dust	SD	1.05024	1.02819	1.35792	1.61685	0.157052	0.685438
P. inermis	Fe(Cl)3	1	4.3705	8.18878	0.403312	0.283402	0.758518	1.10375
P. inermis	Fe(Cl)3	2		8.28971	0.476357	0.205817	0.639034	0.947306
P. inermis	Fe(Cl)3	3			0.295758	0.277143	0.420215	0.400135
P. inermis	Fe(Cl)3	4						1.51317
P. inermis	Fe(Cl)3	5						1.49664
P. inermis	Fe(Cl)3	Mean	4.3705	8.23925	0.391809	0.255454	0.605923	1.0922
P. inermis	Fe(Cl)3	SD		0.0713704	0.0908475	0.0431004	0.171565	0.458495
$ Measured prior to culture addition in canister
£ Measured post culture addition in canister

## Sheet: Culture Growth Data
Species	Treatment	Replicate	Cell Counts (per mL)										Chlorophyll a (μg per L)						Fv/Fm									Particulate Organic Carbon (μg per mL)
			Day 0$	Day 1	Day 4	Day 6	Day 8	Day 10	Day 12	Day 14	Day 17		Day 0*	Day 4	Day 8	Day 12	Day 17		Day 0	Day 4	Day 6	Day 8	Day 10	Day 12	Day 14	Day 17		Start*	End
E. antarctica	Control	1	25	40	120	346	388	600	691	-	-		0.311502	0.79918	2.07979	4.11073	-		-	-	0.186667	0.3	0.16	0.196667	-	-		0.00958527	0.293614
E. antarctica	Control	2	-	34	134	253.5	461	467	789	-	-		-	0.720095	2.09095	3.69267	-		-	-	0.24	0.206667	0.193333	0.16	-	-		-	0.208485
E. antarctica	Control	3	-	26	173	225	444	609	731	-	-		-	0.714968	1.99067	3.31886	-		-	-	0.193333	0.186667	0.253333	0.24	-	-		-	0.287763
E. antarctica	Control	4	-						850	-	-		-			4.44054	-		-	-				0.193333	-	-		-	0.357567
E. antarctica	Control	5	-						870	-	-		-			3.93129	-		-	-				0.216667	-	-		-	0.273246
E. antarctica	Control	Mean	-	33.3333	142.333	274.833	431	558.667	786.2	-	-		-	0.744748	2.0538	3.89882	-		-	-	0.206667	0.231111	0.202222	0.201333	-	-		-	0.284135
E. antarctica	Control	SD	-	7.02377	27.4651	63.2581	38.1969	79.5131	76.1755	-	-		-	0.0472095	0.0549577	0.423754	-		-	-	0.0290593	0.0604918	0.0472973	0.0296835	-	-		-	0.0532372
E. antarctica	Dust	1	26.5	27	229	581.5	2024	4080	5290	-	-		0.311502	2.95479	23.0281	50.8574	-		-	-	0.443333	0.486667	0.49	0.386667	-	-		0.00958527	1.79946
E. antarctica	Dust	2	-	30.6667	210	595	1720	3290	5570	-	-		-	2.97343	19.734	48.2929	-		-	-	0.526667	0.46	0.5	0.363333	-	-		-	2.03856
E. antarctica	Dust	3	-	22	231	544	1940	3360	5170	-	-		-	3.07416	24.0706	50.8845	-		-	-	0.49	0.476667	0.496667	0.38	-	-		-	1.84666
E. antarctica	Dust	4	-						5983	-	-		-			52.3122	-		-	-				0.33	-	-		-	2.22222
E. antarctica	Dust	5	-						6090	-	-		-			54.138	-		-	-				0.35	-	-		-	1.88961
E. antarctica	Dust	Mean	-	26.5556	223.333	573.5	1894.67	3576.67	5620.6	-	-		-	3.00079	22.2776	51.297	-		-	-	0.486667	0.474444	0.495556	0.362	-	-		-	1.9593
E. antarctica	Dust	SD	-	4.35039	11.5902	26.4244	156.988	437.302	408.218	-	-		-	0.0642213	2.2636	2.15	-		-	-	0.0417665	0.0134715	0.00509175	0.022925	-	-		-	0.172119
E. antarctica	Fe(Cl)3	1	30	52	239	635	2790	4020	3680	-	-		0.283183	5.11181	54.1645	88.4948	-		-	0.536667	0.56	0.33	0.193333	0.263333	-	-		0.0107236	1.68498
E. antarctica	Fe(Cl)3	2	-	37	179	595	2690	4240	4180	-	-		-	4.28733	44.9498	87.7512	-		-	0.453333	0.576667	0.403333	0.233333	0.25	-	-		-	1.56526
E. antarctica	Fe(Cl)3	3	-	47	224	708	1910	3430	4150	-	-		-	4.83	51.0501	85.244	-		-	0.583333	0.596667	0.38	0.226667	0.253333	-	-		-	1.75391
E. antarctica	Fe(Cl)3	4	-						3860	-	-		-			85.5564	-		-	-				0.206667	-	-		-	1.70301
E. antarctica	Fe(Cl)3	5	-						3510	-	-		-			88.242	-		-	-				0.22	-	-		-	1.71222
E. antarctica	Fe(Cl)3	Mean	-	45.3333	214	646	2463.33	3896.67	3876	-	-		-	4.74305	50.0548	87.0577	-		-	0.524444	0.577778	0.371111	0.217778	0.238667	-	-		-	1.68388
E. antarctica	Fe(Cl)3	SD	-	7.63763	31.225	57.2975	481.802	418.848	291.599	-	-		-	0.419064	4.68729	1.54047	-		-	0.0658562	0.0183586	0.037466	0.0214303	0.0241062	-	-		-	0.0709657
P. inermis	Control	1	12	20	65.5	164	250	270	322	442	737		0.558276	1.02148	2.54076	5.50373	9.06		-	-	-	0.306667	0.346667	0.283333	0.253333	0.27		0.0296242	0.516188
P. inermis	Control	2	-	12.6667	89	127	246	350	447	598	518		-	1.64853	5.20855	8.63035	11.9152		-	-	-	0.3	0.356667	0.303333	0.263333	0.196667		-	0.745499
P. inermis	Control	3	-	13.5	94	159	311	306	435	676	597		-	0.375218	3.96962	7.44736	10.1699		-	-	-	0.293333	0.343333	0.286667	0.283333	0.296667		-	0.636962
P. inermis	Control	4	-								641		-				8.63035		-	-	-					0.26		-	0.54126
P. inermis	Control	5	-								775		-				8.0505		-	-	-					0.233333		-	0.553734
P. inermis	Control	Mean	-	15.3889	82.8333	150	269	308.667	401.333	572	653.6		-	1.33501	3.90631	7.19381	9.56519		-	-	-	0.3	0.348889	0.291111	0.266667	0.251333		-	0.598729
P. inermis	Control	SD	-	4.01502	15.2179	20.0749	36.428	40.0666	68.9662	119.147	104.215		-	0.443391	1.33502	1.57866	1.52575		-	-	-	0.00666667	0.00693889	0.0107152	0.0152753	0.0380497		-	0.0937329
P. inermis	Dust	1	18.3333	9.66667	105	230	348	379	436	503	387		0.558276	2.81597	8.0151	13.4368	15.8975		-	-	-	0.54	0.563333	0.483333	0.49	0.49		0.0296242	0.87073
P. inermis	Dust	2	-	21	111	192	325	276	368	487	386		-	2.8839	9.69877	12.9202	15.0757		-	-	-	0.48	0.54	0.513333	0.49	0.43		-	0.869349
P. inermis	Dust	3	-	16	96	265	307	265	343	423	362		-	2.81161	8.53181	12.8781	15.3918		-	-	-	0.53	0.56	0.54	0.473333	0.37		-	0.723097
P. inermis	Dust	4	-								478		-				14.801		-	-	-					0.433333		-	0.870892
P. inermis	Dust	5	-								329		-				14.0731		-	-	-					0.466667		-	0.762646
P. inermis	Dust	Mean	-	15.5556	104	229	326.667	306.667	382.333	471	388.4		-	2.83716	8.74856	13.0784	15.0478		-	-	-	0.516667	0.554444	0.512222	0.484444	0.438		-	0.819343
P. inermis	Dust	SD	-	5.67972	7.54983	36.5103	20.5508	62.8835	48.1283	42.332	55.3652		-	0.0405405	0.86251	0.311093	0.680438		-	-	-	0.0321455	0.0126198	0.0283497	0.0096225	0.045375		-	0.0711977
P. inermis	Fe(Cl)3	1	19	23	45	127	169	242	240	287	345		0.707959	2.90263	8.48564	10.7113	9.91704		-	-	-	0.5	0.543333	0.5	0.48	0.433333		0.0301751	0.929277
P. inermis	Fe(Cl)3	2	-	34	57	76	104	200	245	250	225		-	3.21509	8.95784	11.2695	9.04453		-	-	-	0.533333	0.45	0.506667	0.49	0.46		-	0.72761
P. inermis	Fe(Cl)3	3	-	25	58	80	130	196	270	272	188		-	3.52856	8.66888	10.4344	12.2852		-	-	-	0.573333	0.49	0.503333	0.463333	0.463333		-	0.60625
P. inermis	Fe(Cl)3	4	-								205		-				14.0783		-	-	-					0.426667		-	0.467418
P. inermis	Fe(Cl)3	5	-								259		-				12.6608		-	-	-					0.473333		-	0.705229
P. inermis	Fe(Cl)3	Mean	-	27.3333	53.3333	94.3333	134.333	212.667	251.667	269.667	244.4		-	3.21543	8.70412	10.8051	11.5972		-	-	-	0.535556	0.494444	0.503333	0.477778	0.451333		-	0.687157
P. inermis	Fe(Cl)3	SD	-	5.85947	7.23418	28.3608	32.7159	25.482	16.0728	18.61	62.1353		-	0.312963	0.238068	0.425407	2.06757		-	-	-	0.0367171	0.0468251	0.00333333	0.0134715	0.020221		-	0.169865
* Measured in culture and calculated from volume of culture added
$ Measured in canister
Assumed anomalous

## Sheet: Nutrient Data and Uptake Ratio
Species	Treatment	Day	Nitrate (μmol per L)						Phosphate (μmol per L)						Silicate (μmol per L)						Nitrate used (μmol)	Phosphate Used (μmol)	Silicate Used (μmol)	Si:N	SI:P	N:P	Si:POC	Si:Chl a
			Day 0$	Day 4	Day 8	Day 12	Day 17		Day 0$	Day 4	Day 8	Day 12	Day 17		Day 0$	Day 4	Day 8	Day 12	Day 17		Final-Initial	Final-Initial	Final-Initial	mol:mol	mol:mol	mol:mol	mol:mol	mol:mg
			0	4	8	12	17
E. antarctica	Control	1	38.9645	39.3539	37.1918	28.7562	-		2.99463	2.89234	2.6477	1.71396	-		41.0816	40.8039	38.6906	26.7759	-		10.2083	1.28066	14.3058	1.40139	11.1706	7.9711	0.585212	3.48011
E. antarctica	Control	2	-	39.168	38.399	30.9029	-		-	2.85173	2.6808	2.08449	-		-	39.0408	38.7021	29.8483	-		8.06156	0.910131	11.2334	1.39345	12.3426	8.85758	0.647166	3.04207
E. antarctica	Control	3	-		37.3944	37.1072	-		-		2.71887	2.40703	-		-		38.6773	35.6874	-		1.85731	0.587594	5.39423	2.90432	9.18019	3.16087	0.225151	1.62532
E. antarctica	Control	4	-			35.4241	-		-			2.24389	-		-			34.6155	-		3.54037	0.750738	6.46614	1.8264	8.61304	4.71585	0.217203	1.45616
E. antarctica	Control	5	-			31.6791	-		-			3.31017	-		-			27.9008	-		7.2854	-	13.1809	1.80922	-	-	0.579388	3.35281
E. antarctica	Control	Mean	-	39.2609	37.6617	32.7739	-		-	2.87204	2.68246	2.35191	-		-	39.9223	38.69	30.9656	-		6.19058	0.882281	10.1161	1.60761	10.3266	6.17635	0.450824	2.59129
E. antarctica	Control	SD	-	0.131454	0.646448	3.05424	-		-	0.0287154	0.0356121	0.531309	-		-	1.24669	0.0124152	3.57247	-		3.41475	0.296438	3.99414	0.616861	1.73466	2.68553	0.211333	0.974003
E. antarctica	Dust	1	37.9936	37.1174	25.345	3.06294	-		2.93529	2.72013	1.29614	1.01152	-		40.8693	38.3747	31.6248	12.5932	-		34.9307	1.92377	28.2761	0.809492	14.6982	18.1574	0.188737	0.555988
E. antarctica	Dust	2	-	33.053	26.2149	1.9829	-		-	2.49153	1.65662	0.964495	-		-	33.7806	32.5613	9.46749	-		36.0107	1.9708	31.4018	0.872013	15.9336	18.2722	0.185017	0.650237
E. antarctica	Dust	3	-		18.1197	2.35373	-		-		1.05668	0.98222	-		-		21.9393	10.7859	-		35.6399	1.95307	30.0834	0.844093	15.4031	18.2481	0.195667	0.591209
E. antarctica	Dust	4	-			2.42111	-		-			1.00623	-		-			9.50229	-		35.5725	1.92906	31.367	0.881777	16.2602	18.4403	0.169538	0.599612
E. antarctica	Dust	5	-			2.28246	-		-			0.981704	-		-			6.71642	-		35.7112	1.95359	34.1529	0.956365	17.4821	18.2798	0.217087	0.630849
E. antarctica	Dust	Mean	-	35.0852	23.2265	2.42063	-		-	2.60583	1.33648	0.989234	-		-	36.0777	28.7085	9.81307	-		35.573	1.94606	31.0562	0.872748	15.9555	18.2795	0.191209	0.605579
E. antarctica	Dust	SD	-	2.87395	4.44396	0.354327	-		-	0.161641	0.301999	0.0173403	-		-	3.24851	5.88092	1.92254	-		0.39615	0.0193871	2.14947	0.054535	1.038	0.102245	0.0173468	0.0365181
E. antarctica	Fe(Cl)3	1	37.1112	31.3	9.7646	2.0423	-		2.90632	2.41016	1.45377	0.977448	-		41.1902	34.8164	25.7016	12.6566	-		35.0689	1.92887	28.5336	0.813644	14.7929	18.181	0.203396	0.322432
E. antarctica	Fe(Cl)3	2	-	37.2363	17.1517	2.89825	-		-	2.7033	2.07677	1.10669	-		-	40.6852	29.6094	14.7667	-		34.2129	1.79963	26.4235	0.772324	14.6827	19.0111	0.20276	0.301118
E. antarctica	Fe(Cl)3	3	-		12.3821	2.05818	-		-		1.69212	0.969993	-		-		28.475	13.9821	-		35.053	1.93633	27.2081	0.7762	14.0514	18.1028	0.186325	0.319179
E. antarctica	Fe(Cl)3	4	-			2.06333	-		-			0.953225	-		-			13.8288	-		35.0479	1.95309	27.3614	0.780687	14.0093	17.9448	0.192974	0.319806
E. antarctica	Fe(Cl)3	5	-			2.01626	-		-			0.964769	-		-			14.5076	-		35.0949	1.94155	26.6826	0.760297	13.7429	18.0757	0.187175	0.30238
E. antarctica	Fe(Cl)3	Mean	-	34.2681	13.0995	2.21566	-		-	2.55673	1.74089	0.994425	-		-	37.7508	27.9287	13.9484	-		34.8955	1.91189	27.2418	0.780631	14.2558	18.2631	0.194526	0.312983
E. antarctica	Fe(Cl)3	SD	-	4.19763	3.74544	0.341687	-		-	0.207277	0.31435	0.0566848	-		-	4.14984	2.01038	0.730283	-		0.382017	0.0633755	0.816482	0.0199498	0.45726	0.426726	0.00821846	0.0103373
P. inermis	Control	1	38.3321	33.6839	35.7919	32.6522	24.6004		2.85478	2.39464	2.49004	3.26719	2.7779		40.4889	34.7614	35.5594	25.5064	18.0509		13.7317	0.0768874	22.438	1.63402	291.829	178.595	0.5221	2.47659
P. inermis	Control	2	-	32.4749	34.7749	29.2234	20.7287		-	2.45228	2.43905	3.12362	2.61085		-	34.2144	35.6588	26.3654	21.7479		17.6034	0.24393	18.7409	1.06462	76.829	72.1659	0.301942	1.57286
P. inermis	Control	3	-		36.2598	29.7971	20.2929		-		2.43846	3.12498	2.62031		-		35.3768	24.4097	18.543		18.0393	0.234474	21.9459	1.21656	93.596	76.9349	0.413827	2.15793
P. inermis	Control	4	-				24.7397		-				2.70491		-				15.812		13.5924	0.149876	24.6769	1.8155	164.648	90.6907	0.547601	2.85932
P. inermis	Control	5	-				25.8569		-				2.77267		-				16.8577		12.4752	0.0821139	23.6312	1.89425	287.785	151.926	0.512581	2.93536
P. inermis	Control	Mean	-	33.0794	35.6088	30.5576	23.2437		-	2.42346	2.45585	3.17193	2.69733		-	34.4879	35.5317	25.4272	18.2023		15.0884	0.157456	22.2866	1.52499	182.937	114.062	0.45961	2.40041
P. inermis	Control	SD	-	0.8549	0.7592	1.83655	2.27774		-	0.0407625	0.0296105	0.0825009	0.0716028		-	0.386758	0.142993	0.980229	2.01158		2.54659	0.0800544	2.24901	0.367323	102.987	48.1614	0.101746	0.55817
P. inermis	Dust	1	38.9721	37.0526	31.8104	20.7408	13.7439		2.9128	2.68135	2.2649	3.00981	2.55675		40.7468	39.5029	35.7041	30.7809	27.5935		25.2282	0.356052	13.1532	0.521371	36.942	70.8554	0.181438	0.82738
P. inermis	Dust	2	-	39.5304	31.0143	20.5223	11.4753		-	2.70706	2.3066	3.00848	2.24939		-	39.9038	35.7166	30.5451	22.034		27.4968	0.663412	18.7128	0.680545	28.2069	41.4475	0.258537	1.24125
P. inermis	Dust	3	-		30.6423	22.8113	15.448		-		2.22493	3.12214	2.75413		-		34.8563	31.3764	28.431		23.5241	0.158676	12.3157	0.523538	77.6154	148.252	0.204571	0.80015
P. inermis	Dust	4	-				15.2709		-				2.69553		-				28.0818		23.7012	0.217271	12.665	0.534362	58.2913	109.086	0.174671	0.855685
P. inermis	Dust	5	-				16.8715		-				2.78114		-				29.2642		22.1006	0.13166	11.4826	0.51956	87.2135	167.86	0.18084	0.815923
P. inermis	Dust	Mean	-	38.2915	31.1557	21.3581	14.562		2.9128	2.6942	2.26548	3.04681	2.60739		-	39.7034	35.4256	30.9008	27.0809		24.4101	0.305414	13.6659	0.555875	57.6538	107.5	0.200011	0.908078
P. inermis	Dust	SD	-	1.75206	0.596733	1.26322	1.83403		0	0.0181807	0.0408377	0.0652415	0.195048		-	0.283481	0.493141	0.42846	2.58169		2.05051	0.21807	2.88641	0.0699293	25.3414	52.4699	0.0346437	0.187352
P. inermis	Fe(Cl)3	1	38.376	37.5594	27.6268	22.4524	17.4896		2.72616	2.58808	3.32108	2.95146	2.63891		39.7248	39.7199	34.8413	32.149	29.3883		20.8863	0.0872527	10.3365	0.494894	118.467	239.378	0.133601	1.0423
P. inermis	Fe(Cl)3	2	-	38.8363	28.436	22.2549	18.7659		-	2.59911	3.25946	2.98608	2.79391		-	39.9992	34.8301	32.6601	30.6403		19.61	-	9.0845	0.463258	-	-	0.149962	1.00442
P. inermis	Fe(Cl)3	3	-	37.9296	28.0689	19.4978	19.1139		-	2.60462	3.34242	2.68971	2.85802		-	39.9033	34.6977	28.3093	31.7314		19.2621	-	7.99344	0.414983	-	-	0.158366	0.650658
P. inermis	Fe(Cl)3	4	-				17.9888		-				2.74793		-				29.836		20.3871	-	9.88886	0.485054	-	-	0.254109	0.702421
P. inermis	Fe(Cl)3	5	-				19.9061		-				2.78469		-				30.7836		18.4699	-	8.94122	0.484098	-	-	0.152281	0.70621
P. inermis	Fe(Cl)3	Mean	-	38.1084	28.0439	21.4017	18.6529		-	2.59727	3.30765	2.87575	2.76469		-	39.8741	34.7897	31.0395	30.4759		19.7231	-	9.24891	0.468457	-	-	0.169664	0.821202
P. inermis	Fe(Cl)3	SD	-	0.656969	0.405152	1.65177	0.84735		-	0.00842212	0.0430761	0.16204	0.0722024		-	0.141925	0.0798678	2.37818	0.811216		0.947366	-	0.906967	0.0320369	-	-	0.0480872	0.186326
$ Measured in canister
Assumed anomalous

## Sheet: Per Cell Data
Species	Treatment	Replicate	Particulate Organic Carbon (ng per cell)			Chlorophyll (pg per cell)		Silicate (nmol/cell)	Nitrate (nmol/cell)
			Start	End		Start	End	End	End
E. antarctica	Control	1	0.383411	0.424912		12.46	5.94895	0.020703	0.0147732
E. antarctica	Control	2	-	0.264239		-	4.6802	0.0142375	0.0102174
E. antarctica	Control	3	-	0.393657		-	4.54017	0.00737924	0.00254078
E. antarctica	Control	4	-	0.420667		-	5.22417	0.00760722	0.00416514
E. antarctica	Control	5	-	0.314075		-	4.51873	0.0151504	0.00837402
E. antarctica	Control	Mean	-	0.36351		-	4.98244	0.0130155	0.00801411
E. antarctica	Control	SD	-	0.0636308		-	0.54673	0.00561618	0.00488471
E. antarctica	Dust	1	0.361708	0.340162		11.75	9.61388	0.0053452	0.00660315
E. antarctica	Dust	2	-	0.365989		-	8.67018	0.00563767	0.00646512
E. antarctica	Dust	3	-	0.357188		-	9.84227	0.00581884	0.0068936
E. antarctica	Dust	4	-	0.371422		-	8.74348	0.00524269	0.0059456
E. antarctica	Dust	5	-	0.310281		-	8.88966	0.00560803	0.0058639
E. antarctica	Dust	Mean	-	0.349009		-	9.15189	0.00553049	0.00635427
E. antarctica	Dust	SD	-	0.022071		-	0.48118	0.000233347	0.000439482
E. antarctica	Fe(Cl)3	1	0.357453	0.457874		9.44	24.0475	0.00775369	0.00952959
E. antarctica	Fe(Cl)3	2	-	0.374464		-	20.9931	0.0063214	0.00818491
E. antarctica	Fe(Cl)3	3	-	0.422628		-	20.5407	0.00655618	0.00844651
E. antarctica	Fe(Cl)3	4	-	0.441195		-	22.1649	0.00708845	0.00907976
E. antarctica	Fe(Cl)3	5	-	0.487812		-	25.1402	0.00760187	0.00999855
E. antarctica	Fe(Cl)3	Mean	-	0.436795		-	22.5773	0.00706432	0.00904786
E. antarctica	Fe(Cl)3	SD	-	0.0378213		-	1.76393	0.000627479	0.000748866
P. inermis	Control	1	1.58817	0.700391		46.52	12.2956	0.030445	0.0186319
P. inermis	Control	2	-	1.43919		-	23.0023	0.0361794	0.0339835
P. inermis	Control	3	-	1.06694		-	17.035	0.0367602	0.0302165
P. inermis	Control	4	-	0.844399		-	13.4639	0.0384975	0.021205
P. inermis	Control	5	-	0.714496		-	10.3877	0.0304918	0.0160971
P. inermis	Control	Mean	-	0.953082		-	15.2369	0.0344748	0.0240268
P. inermis	Control	SD	-	0.276351		-	4.44621	0.00375549	0.00770384
P. inermis	Dust	1	1.61881	2.24995		30.45	41.0787	0.0339877	0.0651891
P. inermis	Dust	2	-	2.2522		-	39.0563	0.0484787	0.0712351
P. inermis	Dust	3	-	1.9975		-	42.5187	0.0340214	0.0649836
P. inermis	Dust	4	-	1.82195		-	30.9644	0.0264958	0.049584
P. inermis	Dust	5	-	2.31807		-	42.7754	0.0349014	0.067175
P. inermis	Dust	Mean	-	2.12794		-	39.2787	0.035577	0.0636334
P. inermis	Dust	SD	-	0.188213			4.36213	0.00797377	0.00824555
P. inermis	Fe(Cl)3	1	2.46868	2.69356		37.26	28.745	0.029961	0.0605401
P. inermis	Fe(Cl)3	2	-	3.23382		-	40.1979	0.0403756	0.0871557
P. inermis	Fe(Cl)3	3	-	3.22474		-	65.3466	0.0425183	0.102458
P. inermis	Fe(Cl)3	4	-	2.28009		-	68.6745	0.0482384	0.0994495
P. inermis	Fe(Cl)3	5	-	2.72289		-	48.4351	0.0345221	0.0713122
P. inermis	Fe(Cl)3	Mean	-	2.83102		-	50.2798	0.0391231	0.0841831
P. inermis	Fe(Cl)3	SD	-	0.360936		-	15.061	0.00709398	0.0180313

## Sheet: Cell Volume
Species	Treatment	Diatom Cell Volume
		x10-3 μm3	% of control
E. antarctica	Control	21 ± 10	100
	+dust	16 ± 9	77
	+FeCl3	13 ± 8	59
P. inermis	Control	32 ± 9	100
	+dust	34 ±10	107
	+FeCl3	33 ± 10	104

## Sheet: ANOVA
E. antarctica
	ANOVA p value	LSD	+Dust from Control	+FeCl from Control	+Dust from +FeCl
Cells	<0.001	403.7	4834.4	3089.8	1744.6
Chl	<0.001	2.131	47.3982	83.1589	-35.7607
C	<0.001	0.154	1.67517	1.39974	0.275427
N	<0.001	2.752	29.3824	28.7049	0.677471
P	<0.001	0.378	1.24023	1.20607	0.0341649
Si	<0.001	3.667	20.9402	17.1258	3.81441
Chl/Cell	<0.001	1.697	4.16945	17.5948	-13.4254
C/Cell	0.036	0.069	-0.0145014	0.0732848	-0.0877861
Si:POC	0.008	0.1688	-0.259615	-0.256298	-0.00331694
Si:Chl a	<0.001	0.7755	-1.98572	-2.27831	0.292596
Si:N	<0.001	0.183	-0.734866	-0.826984	0.0921176
SI:P	<0.001	1.58	5.62885	3.92924	1.69961
N:P	<0.001	1.987	12.1032	12.0867	0.0164466
Si/Cell	0.008	0.004	-0.00748499	-0.00595116	-0.00153383
NO3/Cell	0.357	0.004	-0.00165984	0.00103375	-0.00269359
P. inermis
	ANOVA p value	LSD	+Dust from Control	+FeCl from Control	+Dust from +FeCl
Cells	<0.001	106.1	-265.2	-409.2	144
Chl	<0.001	2.11	5.48263	2.03198	3.45064
C	0.038	0.16	0.220614	0.0884281	0.132186
N	<0.001	1.24	9.32174	4.63469	4.68705
P	0.019	0.19	0.147958	-0.140006	0.287964
Si	<0.001	3	-8.62069	-13.0376	4.41695
Chl/Cell	<0.001	14.497	24.0418	35.0429	-11.0011
C/Cell	<0.001	0.438	1.17485	1.87794	-0.703083
Si:POC	<0.001	0.0937	-0.259599	-0.289946	0.0303476
Si:Chl a	<0.001	0.4913	-1.49233	-1.57921	0.0868766
Si:N	<0.001	0.137	-0.969114	-1.05653	0.0874178
SI:P	0.081	109.38	-	-	-
N:P	0.005	73.45	-	-	-
Si/Cell	0.52	0.009	-0.00110222	-0.00464827	0.00422164
NO3/Cell	<0.001	0.017	-0.0396066	-0.0472855	-0.00413729
